# Supplementary material for: Resilience During a Pandemic: Impact of the COVID-19 Pandemic on Routine Immunization Programs in Northern Nigeria
Source: Preprints.org preprint supplement (doi:10.20944/preprints202304.0993.v1), 2023-04-26
Supplement: Supplementary file 1 [file supplementary]

**
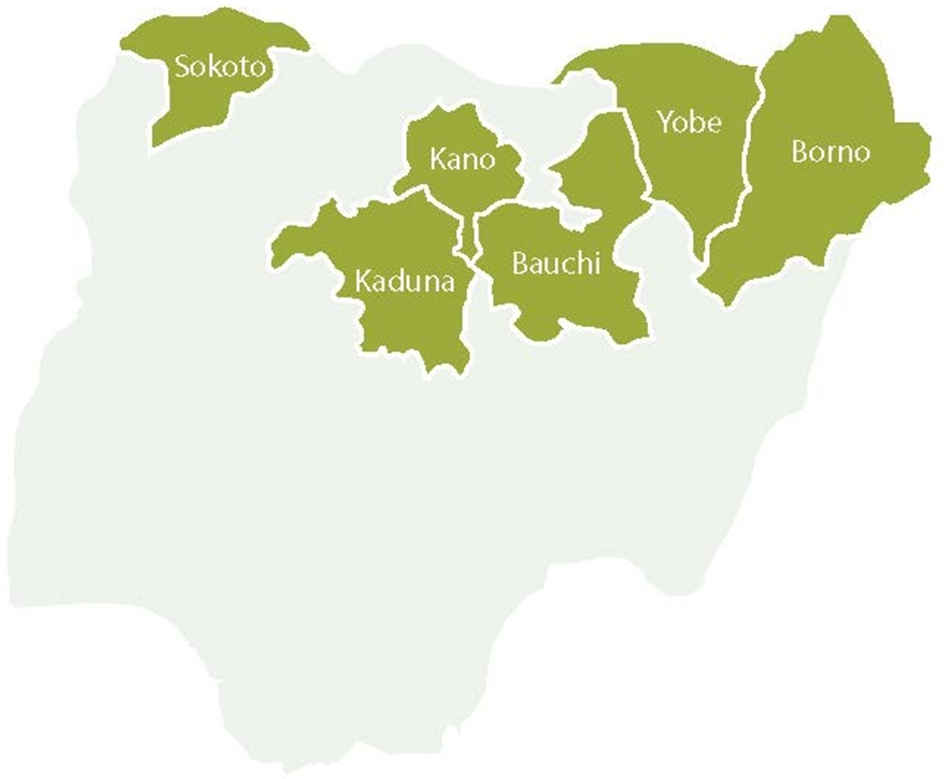
**

**Figure S1:** The six (6) Northern states SCIDaR provides RI strengthening support (USAID, 2019)

**
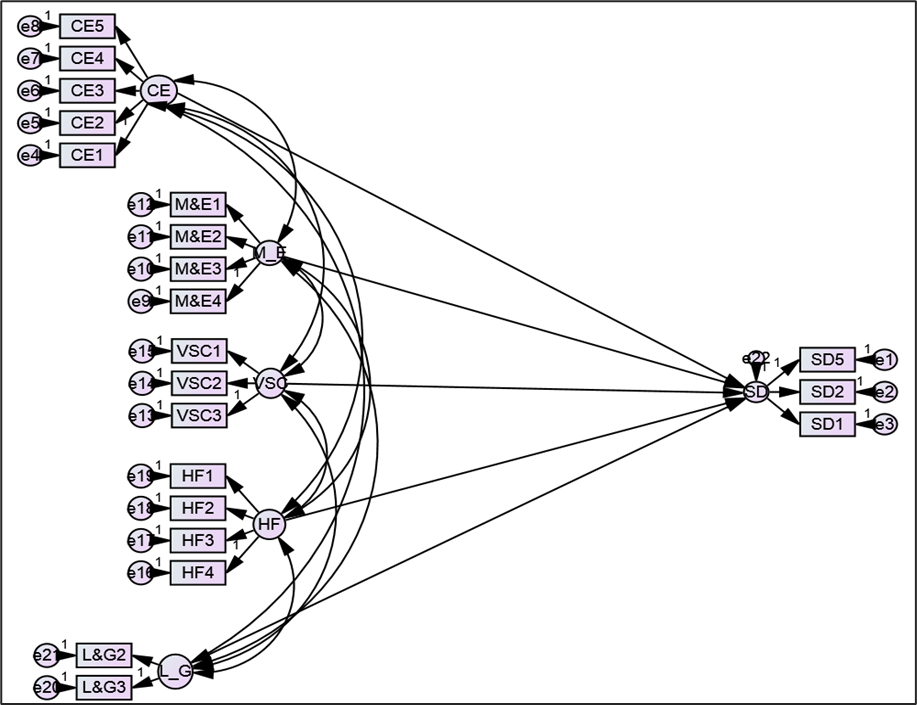
**

**Figure S2:** The study model/framework using SEM designed path analysis [Hypothesis H2.1 - H6.1]

**Table S1:** Questionnaire guide for survey

| **Level** | **Focus** | **Participants** | **Interview method** |
| --- | --- | --- | --- |
| State | - The perceived effect of COVID-19 on SPHCMB operations and its routine activities - Impact of the pandemic on the availability of resources and personnel to implement program activities - The effect on the delivery of essential PHC services across health facilities and LGAs - Possible strategies to encourage personnel to continue program implementation throughout the pandemic | HCH, ES SPHCMB, Directors, PMs and program officers (2 program officers and directors) | KII |
| LGA | - The effect of COVID-19 on LGA operations and its routine activities - The effect on the delivery of essential PHC services across health facilities in LGAs - The effect of the pandemic on resource availability for PHC services in the LGA | LGHA team (2 respondents per LGA) | KII |
| Health facility | - The general perspective of community dwellers and health workers on PHC services during the pandemic - Essential needs of the service providers that will enable continuity of service provision | Service providers, health facility in-charges (2 service providers per HF) | KII |
| Settlements | - The general perspective of community dwellers on health facility visits during the pandemic - Possible strategies to motivate community members to access essential services during the pandemic | Traditional leaders, VCMs and caregivers (2 caregivers per settlement/facility) | KII |

**Table S2:** Kaiser-Meyer-Olkin and Bartlett's Test

| KMO Measure of Sampling Adequacy. |  | 0.951 |
| --- | --- | --- |
| Bartlett's Test of Sphericity | Approx. Chi-Square | 5841.294 |
|  | df | 276 |
|  | Sig. | <0.001 |

**Table S3:** Initial Eigenvalues and Rotation Sums of Squared Loadings

| Comp | Initial Eigenvalues | | | Rotation Sums of Squared Loadings | | |
| --- | --- | --- | --- | --- | --- | --- |
|  | Total | % of Variance | Cumulative % | Total | % of Variance | Cumulative % |
| 1 | 13.551 | 56.462 | 56.462 | 6.794 | 28.306 | 28.306 |
| 2 | 1.767 | 7.362 | 63.824 | 4.776 | 19.899 | 48.205 |
| 3 | 1.185 | 4.938 | 68.762 | 3.483 | 14.513 | 62.718 |
| 4 | 1.053 | 4.388 | 73.150 | 2.504 | 10.432 | 73.150 |
| 5 | 0.890 | 3.707 | 76.857 |  |  |  |
| 6 | 0.634 | 2.641 | 79.498 |  |  |  |
| 7 | 0.596 | 2.485 | 81.983 |  |  |  |

***Note:*** *Comp=Component*


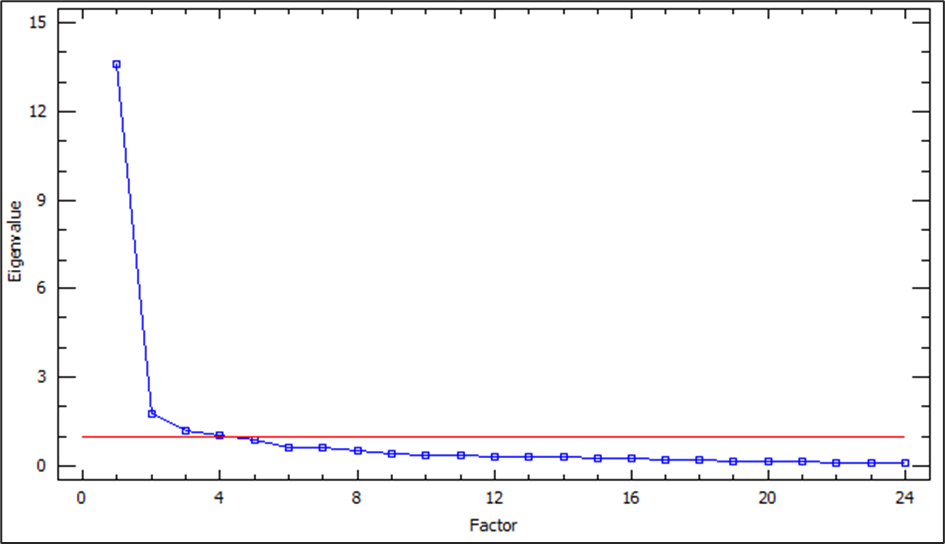


**Figure S3:** Components with factor loadings matrix

**Table S4:** Initial Eigenvalues and Rotation Sums of Squared Loadings

| **Indicators** | **C1** | **Cronbach’s α** | **C2** | **Cronbach’s α** | **C3** | **Cronbach’s α** | **C4** | **Cronbach’s α** |
| --- | --- | --- | --- | --- | --- | --- | --- | --- |
| **SD1** | 0.537 | 0.728 |  |  |  |  |  |  |
| **SD2** | 0.678 |  |  |  |  |  |  |
| **SD3** | 0.199 |  |  |  |  |  |  |
| **SD4** | 0.495 |  |  |  |  |  |  |
| **SD5** | 0.643 |  |  |  |  |  |  |
| **CE1** | 0.680 |  |  |  |  |  |  |
| **CE2** | 0.692 |  |  |  |  |  |  |
| **CE3** | 0.766 |  |  |  |  |  |  |
| **CE4** | 0.728 |  |  |  |  |  |  |
| **CE5** | 0.767 |  |  |  |  |  |  |
| **M&E1** | 0.719 |  |  |  |  |  |  |
| **M&E2** | 0.659 |  |  |  |  |  |  |
| **M&E3** | 0.691 |  |  |  |  |  |  |
| **M&E4** | 0.661 |  |  |  |  |  |  |
| **VSC1** |  |  |  |  | 0.575 | 0.742 |  |  |
| **VSC2** |  |  |  |  | 0.543 |  |  |
| **VSC3** |  |  |  |  | 0.607 |  |  |
| **HF1** |  |  | 0.787 | 0.861 |  |  |  |  |
| **HF2** |  |  | 0.835 |  |  |  |  |
| **HF3** |  |  | 0.860 |  |  |  |  |
| **HF4** |  |  | 0.784 |  |  |  |  |
| **L&G1** |  |  |  |  |  |  | 0.487 | 0.892 |
| **L&G2** |  |  |  |  |  |  | 0.814 |
| **L&G3** |  |  |  |  |  |  | 0.837 |


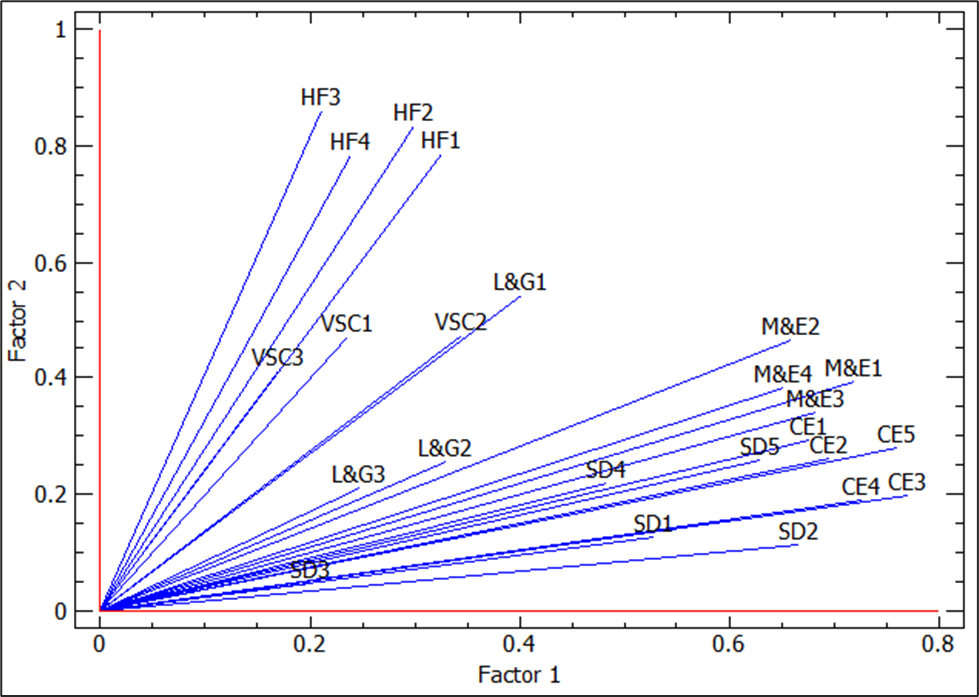


**Figure S4:** Factor loading in components
